# Supplementary material for: A comparative study of different imaging modalities for successful percutaneous left atrial appendage closure
Source: PubMed Central journal article supplement — Open Heart. 2017 Jun 30;4(2):e000627. doi: 10.1136/openhrt-2017-000627 (PMC5515183; doi:10.1136/openhrt-2017-000627), 2017-06-30
Supplement: openhrt-2017-000627supp003.pdf [file openhrt-2017-000627supp003.pdf]

## Suppl File 3

### (A) Amulet™ LAA closure device

| Max landing zone width (mm) – TEE | Recommended oversizing | Recommended device size (mm) |
|-----------------------------------|------------------------|------------------------------|
| 11.0-13.0                         | + 3-5 mm               | 16                           |
| 13.0-15.0                         | + 3-5 mm               | 18                           |
| 15.0-17.0                         | + 3-5 mm               | 20                           |
| 17.0-19.0                         | + 3-5 mm               | 22                           |
| 19.0-22.0                         | + 3-6 mm               | 25                           |
| 22.0-25.0                         | + 3-6 mm               | 28                           |
| 25.0-28.0                         | + 3-6 mm               | 31                           |
| 28.0-31.0                         | + 3-6 mm               | 34                           |

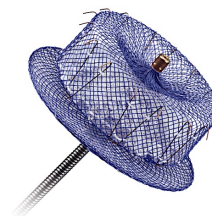

Recommended device compression: **N/A**

### (B) Watchman™ LAA closure device

| Max LAA ostium width (mm) – TEE | Recommended oversizing | Recommended device size (mm) |
|---------------------------------|------------------------|------------------------------|
| 17.0-19.0                       | + 2-4 mm               | 21                           |
| 20.0-22.0                       | + 2-4 mm               | 24                           |
| 23.0-25.0                       | + 2-4 mm               | 27                           |
| 26.0-28.0                       | + 2-4 mm               | 30                           |
| 29.0-31.0                       | + 2-4 mm               | 33                           |

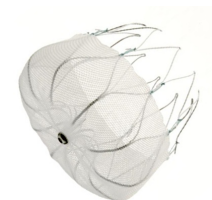

Recommended device compression: **8-20%**

### (C) WatchmanFLX™ LAA closure device

| Max LAA ostium width (mm) – TEE | Recommended oversizing | Recommended device size (mm) |
|---------------------------------|------------------------|------------------------------|
| 15.0-18.0                       | + 2-5 mm               | 20                           |
| 17.5-21.5                       | + 2.5-6.5 mm           | 24                           |
| 20.0-24.0                       | + 3-7 mm               | 27                           |
| 23.0-28.0                       | + 3-8 mm               | 31                           |
| 26.0-32.0                       | + 3-9 mm               | 35                           |

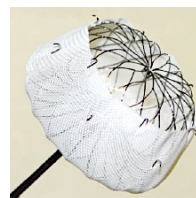

Recommended device compression: **10-26%**

**Suppl. File 3.** Company recommended oversizing for the three different LAA closure devices – based on maximal LAA landing zone or LAA ostium width as measured by transesophageal echocardiography.
