# Supplementary material for: A comparative study of different imaging modalities for successful percutaneous left atrial appendage closure
Source: PubMed Central journal article supplement — Open Heart. 2017 Jun 30;4(2):e000627. doi: 10.1136/openhrt-2017-000627 (PMC5515183; doi:10.1136/openhrt-2017-000627), 2017-06-30
Supplement: openhrt-2017-000627supp004.pdf [file openhrt-2017-000627supp004.pdf]

## Suppl File 4

### (A) Amulet™ LAA closure device

| Mean landing zone width (mm) – CT | Recommended oversizing | Recommended device size (mm) |
|-----------------------------------|------------------------|------------------------------|
| 14.0-16.0                         | + 0-2 mm               | 16                           |
| 16.0-18.0                         | + 0-2 mm               | 18                           |
| 18.0-20.0                         | + 0-2 mm               | 20                           |
| 20.0-22.0                         | + 0-2 mm               | 22                           |
| 22.0-25.0                         | + 0-3 mm               | 25                           |
| 25.0-28.0                         | + 0-3 mm               | 28                           |
| 28.0-31.0                         | + 0-3 mm               | 31                           |
| 31.0-34.0                         | + 0-3 mm               | 34                           |

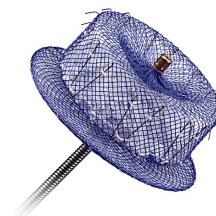

Recommended device compression: **10-20%**

### (B) Watchman™ LAA closure device

| Max LAA ostium width (mm) – CT | Recommended oversizing | Recommended device size (mm) |
|--------------------------------|------------------------|------------------------------|
| 18.0-21.0                      | + 0-3 mm               | 21                           |
| 21.0-24.0                      | + 0-3 mm               | 24                           |
| 24.0-27.0                      | + 0-3 mm               | 27                           |
| 27.0-30.0                      | + 0-3 mm               | 30                           |
| 30.0-33.0                      | + 0-3 mm               | 33                           |

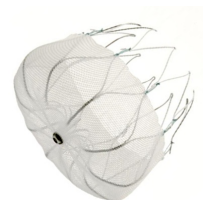

Recommended device compression: **10-20%**

### (C) WatchmanFLX™ LAA closure device

| Mean LAA ostium width (mm) – CT | Recommended oversizing | Recommended device size (mm) |
|---------------------------------|------------------------|------------------------------|
| 16.0-20.0                       | + 0-4 mm               | 20                           |
| 20.0-24.0                       | + 0-4 mm               | 24                           |
| 24.0-27.0                       | + 0-3 mm               | 27                           |
| 27.0-31.0                       | + 0-4 mm               | 31                           |
| 31.0-35.0                       | + 0-4 mm               | 35                           |

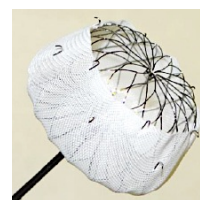

Recommended device compression: **10-20%**

**Suppl. File 4.** Recommended oversizing for the three different LAA closure devices – based on (A) mean landing zone width for Amulet™ device, (B) maximal LAA ostium width for Watchman™ device, and (C) mean LAA ostium for WatchmanFLX™ device – as measured by multi-slice computed tomography (MSCT).
